# Supplementary material
Source: PubMed Central journal article supplement (PMC4259182)
Supplement: Supp_Fig1.pdf [file Supp_Fig1.pdf]

## Supplementary Data

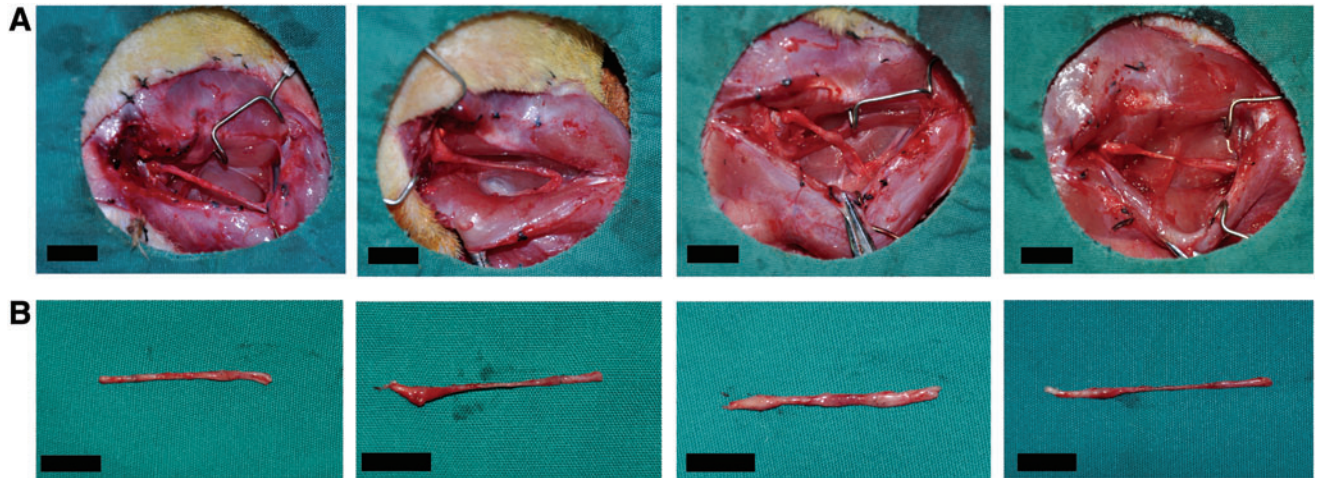

**SUPPLEMENTARY FIG. S1.** The sciatic nerve graft site at 12 weeks after implantation. (A) A macroscopic view captured *in situ* and (B) the nerve guide after explantation. Scale bar= 1 cm.
